# Supplementary material for: From ionising radiation to air ion formation in the lower atmosphere
Source: Copernicus journal article supplement (doi:10.5194/acp-2016-440), 2016-06-20
Supplement: Supplementary file 1 [file acp-2016-440-supplement.pdf]

## Supplementary

Figure S1. 10-min median radon ionising capacities on event and non-event days in different seasons over 2003-2006.

Figure S2. Relationship between the hourly ionising capacity and the 0.8-1 nm ion concentration when the condensation sink (CS) is below  $0.001 \text{ s}^{-1}$ . Upper panel: with relative humidity (RH) on the colour scale. Middle panel: with air temperature ( $T$ ) on the colour scale. Lower panel: with condensational sink (CS) on the colour scale.

Figure S3. Diurnal relationship between median solar radiation intensities and ion concentrations in 0.8-1 nm, 1-1.2 nm and 1.2-1.7 nm sub-cluster size ranges in different seasons over 2003-2006.

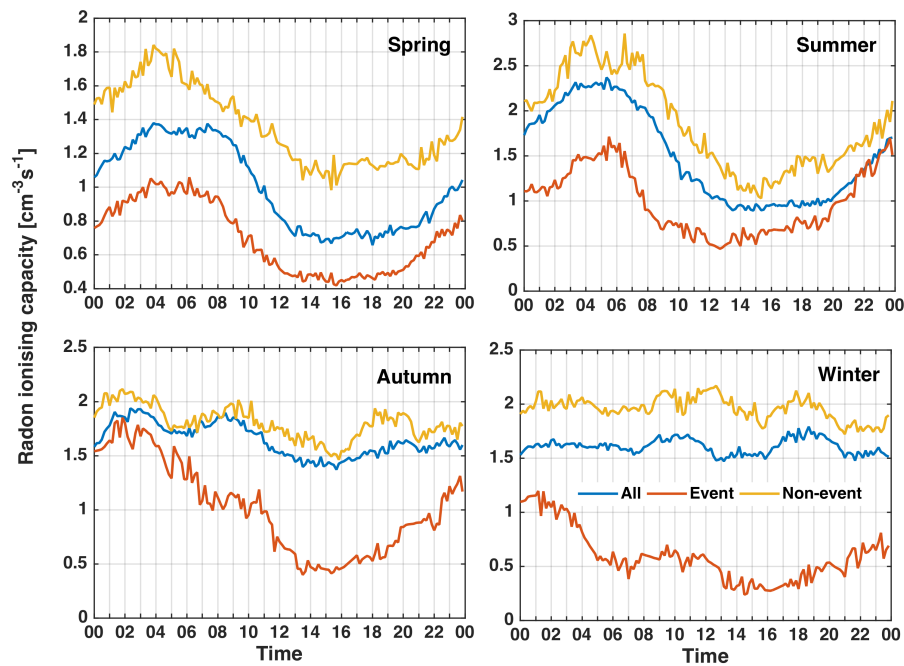

Figure S1. 10-min median radon ionising capacities on event and non-event days in different seasons over 2003-2006.

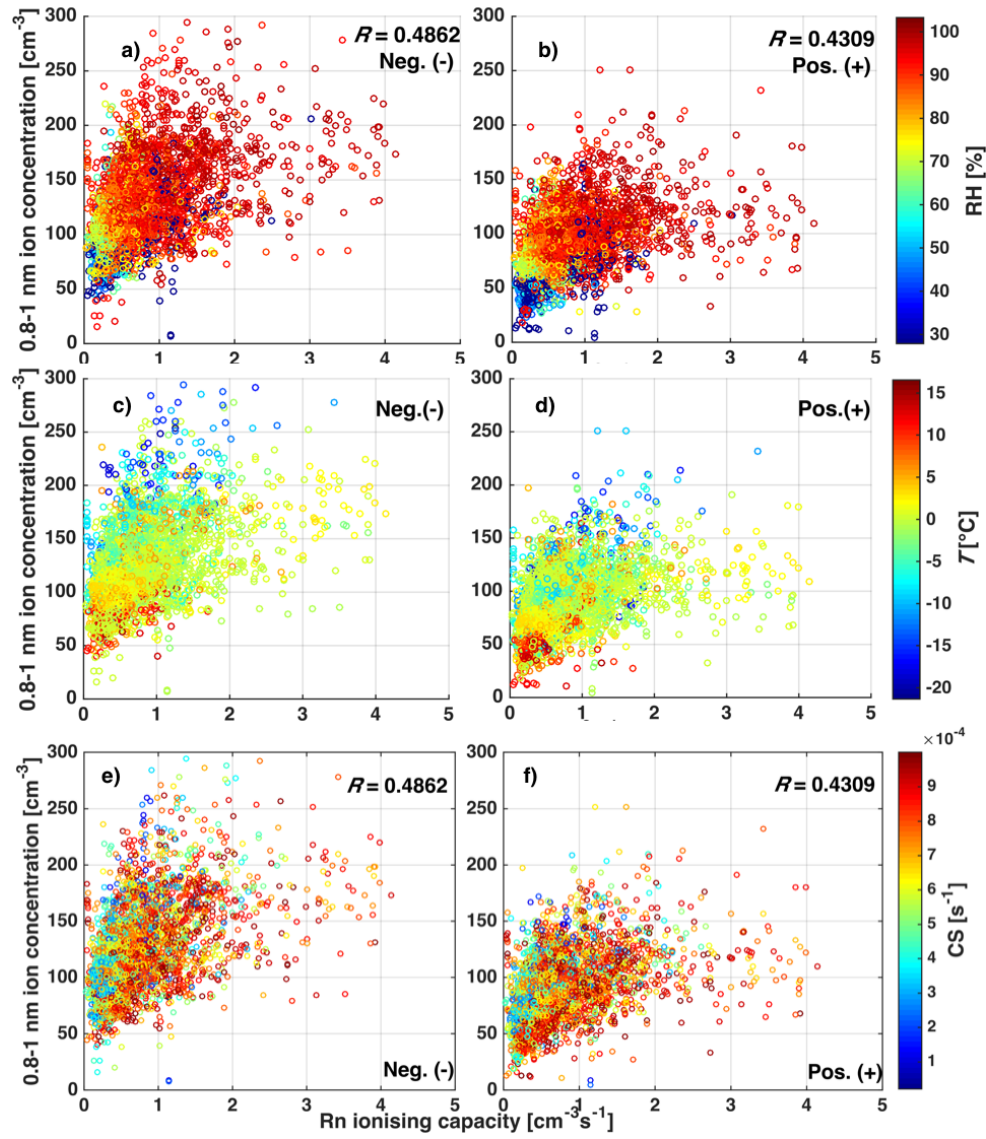

Figure S2. Relationship between the hourly ionising capacity and the 0.8-1 nm ion concentration when the condensation sink (CS) is below 0.001 s<sup>-1</sup>. Upper panel: with relative humidity (RH) on the colour scale. Middle panel: with air temperature ( $T$ ) on the colour scale. Lower panel: with condensational sink (CS) on the colour scale.

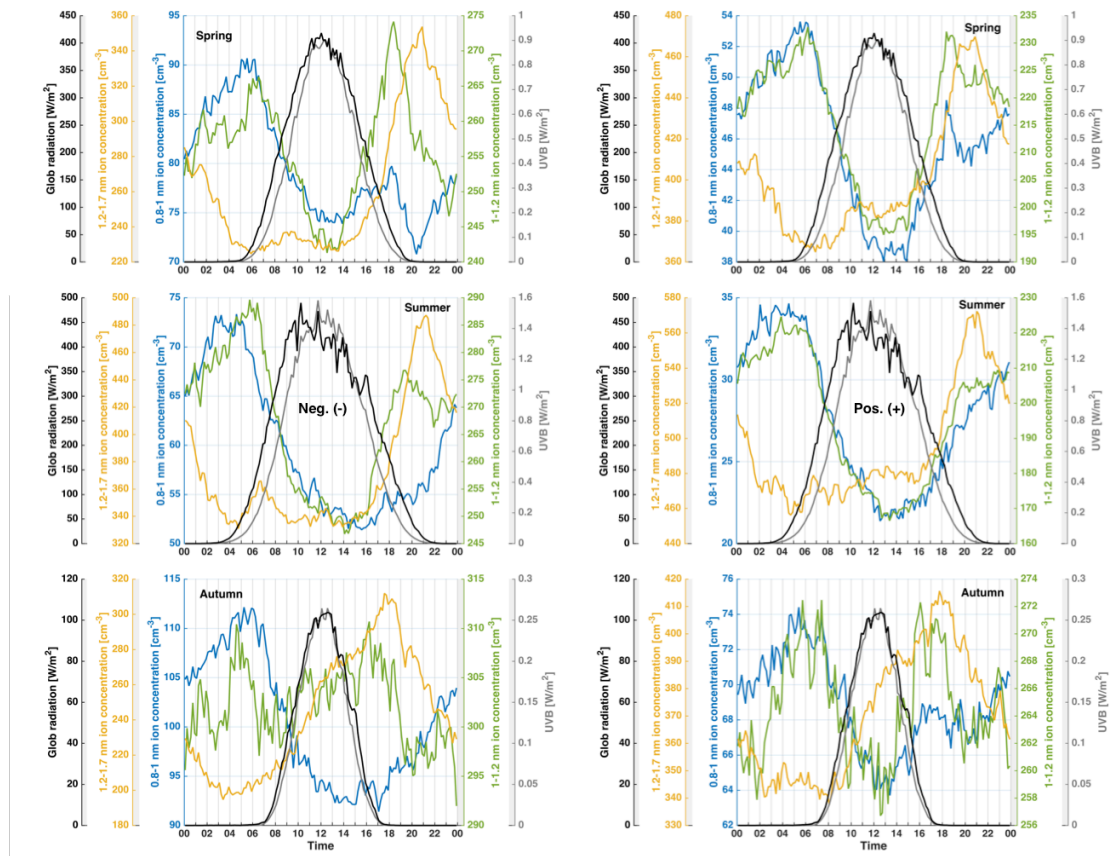

Figure S3. Diurnal relationship between median solar radiation intensities and ion concentrations in 0.8-1 nm, 1-1.2 nm and 1.2-1.7 nm sub-cluster size ranges in different seasons over 2003-2006.
